# Supplementary material for: A luminescent and dichroic hexagermane
Source: Royal Society of Chemistry journal article supplement (doi:10.1039/c3cc45450a), 2013-01-01

yo

**Supporting Information for**

**A Luminescent and Dichroic Hexagermane**

Kimberly D. Roewe, Arnold L. Rheingold, and Charles S. Weinert\*

### ***Experimental Details***

**Preparation of 3:** A suspension of Ge<sub>4</sub>Ph<sub>8</sub> (0.30 g, 0.33 mmol)<sup>[14]</sup> in benzene (50 mL) was titrated with a 0.059 M solution of bromine in benzene until the solution remained colorless. The volatiles were removed *in vacuo* and the resulting solid was washed with Et<sub>2</sub>O (3 x 5 mL) and dried *in vacuo* to yield **3** (0.31 g, 89 %) as a white solid. <sup>1</sup>H NMR (C<sub>6</sub>D<sub>6</sub>, 25 °C) δ 7.60 (d, *J* = 7.8 Hz, 8 H, *o*-C<sub>6</sub>H<sub>5</sub>), 7.41 (d, *J* = 7.5 Hz, 8 H, *o*-C<sub>6</sub>H<sub>5</sub>), 7.06 – 6.90 (m, 24 H, *m*-C<sub>6</sub>H<sub>5</sub> and *p*-C<sub>6</sub>H<sub>5</sub>) ppm. <sup>13</sup>C NMR (C<sub>6</sub>D<sub>6</sub>, 25 °C) δ 136.7 (*ipso*-C<sub>6</sub>H<sub>5</sub>), 134.7 (*ipso*-C<sub>6</sub>H<sub>5</sub>), 130.0 (*o*-C<sub>6</sub>H<sub>5</sub>), 129.4 (*o*-C<sub>6</sub>H<sub>5</sub>), 128.8 (*m*-C<sub>6</sub>H<sub>5</sub>), 128.6 (*m*-C<sub>6</sub>H<sub>5</sub>), 128.1 (*p*-C<sub>6</sub>H<sub>5</sub>), 127.9 (*p*-C<sub>6</sub>H<sub>5</sub>) ppm. UV/Vis (CH<sub>2</sub>Cl<sub>2</sub>): λ<sub>max</sub> 281 nm (ε 8.4 x 10<sup>4</sup> M<sup>-1</sup> cm<sup>-1</sup>). Anal. Calcd. for C<sub>48</sub>H<sub>40</sub>Br<sub>2</sub>Ge<sub>4</sub>: C, 54.00; H, 3.78. Found: C, 53.87; H, 3.83.

**Preparation of 4:** To a solution of **3** (1.05 g, 0.984 mmol) in Et<sub>2</sub>O (60 mL) was added LiAlH<sub>4</sub> (0.08 g, 2 mmol) under blowing nitrogen. The reaction mixture was stirred for 18 h at room temperature and the volatiles were removed *in vacuo*. The resulting material was taken up in benzene and filtered through Celite. The benzene was removed *in vacuo* and the resulting solid was washed with hexane (3 x 5 mL) and dried *in vacuo* to yield **4** (0.75 g, 84 %) as a white solid. <sup>1</sup>H NMR (C<sub>6</sub>D<sub>6</sub>, 25 °C) δ 7.50 (d, *J* = 6.3 Hz, 8 H, *o*-C<sub>6</sub>H<sub>5</sub>), 7.38 (d, *J* = 6.3 Hz, 8 H, *o*-C<sub>6</sub>H<sub>5</sub>), 7.04 – 6.95 (m, 24 H, *m*-C<sub>6</sub>H<sub>5</sub> and *p*-C<sub>6</sub>H<sub>5</sub>), 5.63 (s, 2H, -Ge-H) ppm. <sup>13</sup>C NMR (C<sub>6</sub>D<sub>6</sub>, 25 °C) δ 136.5 (*ipso*-C<sub>6</sub>H<sub>5</sub>), 136.0 (*ipso*-C<sub>6</sub>H<sub>5</sub>), 128.9 (*o*-C<sub>6</sub>H<sub>5</sub>), 128.8 (*o*-C<sub>6</sub>H<sub>5</sub>), 128.5 (*m*-C<sub>6</sub>H<sub>5</sub>), 128.3 (*m*-C<sub>6</sub>H<sub>5</sub>), 128.1 (*p*-C<sub>6</sub>H<sub>5</sub>), 127.7 (*p*-C<sub>6</sub>H<sub>5</sub>) ppm. Anal. Calcd. for C<sub>48</sub>H<sub>42</sub>Ge<sub>4</sub>: C, 63.37; H, 4.66. Found: C, 63.26; H, 4.59.

**Preparation of 1:** To a solution of Pr<sup>*i*</sup><sub>3</sub>GeNMe<sub>2</sub> (0.22 g, 0.90 mmol)<sup>[29]</sup> in CH<sub>3</sub>CN (15 mL) was added a solution of **4** (0.40 g, 0.45 mmol) in CH<sub>3</sub>CN (15 mL). The reaction mixture was sealed

in a Schlenk tube and was stirred in an oil bath at 90 °C for 72 h, after which time a white precipitate was present. The reaction mixture was cooled and the solid was collected by filtration and washed with hexane (3 x 5 mL) to yield **1** (0.23 g, 40. %) as a white solid. <sup>1</sup>H NMR (C<sub>6</sub>D<sub>6</sub>, 25 °C) δ 7.39 (d, *J* = 7.5 Hz, 8 H, *o*-C<sub>6</sub>H<sub>5</sub>), 7.34 (d, *J* = 7.5 Hz, 8 H, *o*-C<sub>6</sub>H<sub>5</sub>), 7.15 – 6.96 (m, 24 H, *m*-C<sub>6</sub>H<sub>5</sub> and *p*-C<sub>6</sub>H<sub>5</sub>), 1.48 (sept, *J* = 7.2 Hz, 6H, -CH(CH<sub>3</sub>)<sub>2</sub>), 0.89 (d, *J* = 7.2 Hz, 18 H, -CH(CH<sub>3</sub>)<sub>2</sub>) ppm. <sup>13</sup>C NMR (C<sub>6</sub>D<sub>6</sub>, 25 °C) δ 137.3 (*ipso*-C<sub>6</sub>H<sub>5</sub>), 137.0 (*ipso*-C<sub>6</sub>H<sub>5</sub>), 128.3 (*o*-C<sub>6</sub>H<sub>5</sub>), 128.2 (*o*-C<sub>6</sub>H<sub>5</sub>), 128.1 (*m*-C<sub>6</sub>H<sub>5</sub>), 127.9 (*m*-C<sub>6</sub>H<sub>5</sub>), 127.7 (*p*-C<sub>6</sub>H<sub>5</sub>), 127.6 (*p*-C<sub>6</sub>H<sub>5</sub>), 21.2 (-CH(CH<sub>3</sub>)<sub>2</sub>), 18.2 (-CH(CH<sub>3</sub>)<sub>2</sub>) ppm. Anal. Calcd. for C<sub>66</sub>H<sub>82</sub>Ge<sub>6</sub>: C, 60.44; H, 6.31. Found: C, 60.36; H, 6.36.

### Crystallographic Data for $\text{Pr}^i_3\text{Ge}(\text{GePh}_2)_4\text{GePr}^i_3$ (1)

Table 1. Crystal data and structure refinement for wein145.

|                                   |                                                 |                 |
|-----------------------------------|-------------------------------------------------|-----------------|
| Identification code               | wein145                                         |                 |
| Empirical formula                 | C <sub>66</sub> H <sub>82</sub> Ge <sub>6</sub> |                 |
| Formula weight                    | 1310.86                                         |                 |
| Temperature                       | 100(2) K                                        |                 |
| Wavelength                        | 0.71073 Å                                       |                 |
| Crystal system                    | Triclinic                                       |                 |
| Space group                       | P-1                                             |                 |
| Unit cell dimensions              | a = 11.0685(7) Å                                | α = 97.447(2)°  |
|                                   | b = 11.3771(6) Å                                | β = 91.495(2)°  |
|                                   | c = 12.7949(8) Å                                | γ = 108.292(2)° |
| Volume                            | 1513.09(16) Å <sup>3</sup>                      |                 |
| Z                                 | 1                                               |                 |
| Density (calculated)              | 1.439 g/cm <sup>3</sup>                         |                 |
| Absorption coefficient            | 2.980 mm <sup>-1</sup>                          |                 |
| F(000)                            | 670                                             |                 |
| Crystal size                      | 0.30 x 0.25 x 0.20 mm <sup>3</sup>              |                 |
| Theta range for data collection   | 1.91 to 28.36°                                  |                 |
| Index ranges                      | -14 ≤ h ≤ 12, -11 ≤ k ≤ 15, -17 ≤ l ≤ 16        |                 |
| Reflections collected             | 16375                                           |                 |
| Independent reflections           | 7179 [R(int) = 0.0221]                          |                 |
| Completeness to theta = 25.00°    | 97.6 %                                          |                 |
| Absorption correction             | Multi-scan                                      |                 |
| Max. and min. transmission        | 0.5871 and 0.4684                               |                 |
| Refinement method                 | Full-matrix least-squares on F <sup>2</sup>     |                 |
| Data / restraints / parameters    | 7179 / 0 / 325                                  |                 |
| Goodness-of-fit on F <sup>2</sup> | 1.040                                           |                 |
| Final R indices [I > 2σ(I)]       | R1 = 0.0197, wR2 = 0.0472                       |                 |
| R indices (all data)              | R1 = 0.0244, wR2 = 0.0487                       |                 |
| Largest diff. peak and hole       | 0.397 and -0.366 e Å <sup>-3</sup>              |                 |

Table 2. Atomic coordinates ( $\times 10^4$ ) and equivalent isotropic displacement parameters ( $\text{\AA}^2 \times 10^3$ ) for wein145.  $U(\text{eq})$  is defined as one third of the trace of the orthogonalized  $U^{ij}$  tensor.

|       | x       | y        | z        | $U(\text{eq})$ |
|-------|---------|----------|----------|----------------|
| Ge(1) | 7049(1) | 8530(1)  | 8177(1)  | 12(1)          |
| Ge(2) | 5714(1) | 6420(1)  | 7357(1)  | 9(1)           |
| Ge(3) | 5198(1) | 6089(1)  | 5429(1)  | 9(1)           |
| C(1)  | 8837(1) | 8597(1)  | 8534(1)  | 16(1)          |
| C(2)  | 8990(2) | 7878(2)  | 9437(1)  | 24(1)          |
| C(3)  | 9478(2) | 8189(2)  | 7569(1)  | 19(1)          |
| C(4)  | 6303(2) | 9023(2)  | 9494(1)  | 20(1)          |
| C(5)  | 7199(2) | 10243(2) | 10122(2) | 30(1)          |
| C(6)  | 5912(2) | 7995(2)  | 10196(1) | 26(1)          |
| C(7)  | 7087(2) | 9751(1)  | 7181(1)  | 20(1)          |
| C(8)  | 5971(2) | 10274(2) | 7307(2)  | 24(1)          |
| C(9)  | 8359(2) | 10813(2) | 7275(2)  | 30(1)          |
| C(10) | 3993(1) | 5998(1)  | 7879(1)  | 13(1)          |
| C(11) | 3298(2) | 4757(1)  | 7972(1)  | 18(1)          |
| C(12) | 2033(2) | 4440(2)  | 8235(1)  | 24(1)          |
| C(13) | 1445(2) | 5348(2)  | 8414(1)  | 24(1)          |
| C(14) | 2121(2) | 6582(2)  | 8333(1)  | 19(1)          |
| C(15) | 3382(2) | 6900(1)  | 8066(1)  | 14(1)          |
| C(16) | 6509(1) | 5223(1)  | 7773(1)  | 12(1)          |
| C(17) | 7376(1) | 4858(1)  | 7140(1)  | 14(1)          |
| C(18) | 8037(2) | 4097(2)  | 7472(1)  | 20(1)          |
| C(19) | 7842(2) | 3704(2)  | 8455(1)  | 22(1)          |
| C(20) | 6975(2) | 4044(2)  | 9089(1)  | 21(1)          |
| C(21) | 6312(2) | 4791(1)  | 8747(1)  | 17(1)          |
| C(22) | 6421(1) | 7219(1)  | 4624(1)  | 12(1)          |
| C(23) | 7734(2) | 7600(1)  | 4885(1)  | 17(1)          |
| C(24) | 8587(2) | 8397(2)  | 4303(2)  | 24(1)          |
| C(25) | 8140(2) | 8829(2)  | 3462(2)  | 23(1)          |
| C(26) | 6841(2) | 8458(1)  | 3188(1)  | 19(1)          |
| C(27) | 5988(2) | 7646(1)  | 3758(1)  | 14(1)          |
| C(28) | 3652(1) | 6591(1)  | 5401(1)  | 13(1)          |

|       |         |         |         |       |
|-------|---------|---------|---------|-------|
| C(29) | 2462(2) | 5775(2) | 5591(1) | 18(1) |
| C(30) | 1402(2) | 6186(2) | 5673(1) | 26(1) |
| C(31) | 1515(2) | 7411(2) | 5568(2) | 32(1) |
| C(32) | 2677(2) | 8233(2) | 5395(2) | 28(1) |
| C(33) | 3745(2) | 7832(2) | 5319(1) | 19(1) |

---

Table 3. Bond lengths [Å] and angles [°] for wein145.

|                   |            |                     |             |
|-------------------|------------|---------------------|-------------|
| Ge(1)-C(4)        | 1.9892(16) | C(13)-C(14)         | 1.387(2)    |
| Ge(1)-C(7)        | 1.9948(16) | C(14)-C(15)         | 1.391(2)    |
| Ge(1)-C(1)        | 1.9952(16) | C(16)-C(21)         | 1.396(2)    |
| Ge(1)-Ge(2)       | 2.4670(2)  | C(16)-C(17)         | 1.397(2)    |
| Ge(2)-C(16)       | 1.9552(15) | C(17)-C(18)         | 1.393(2)    |
| Ge(2)-C(10)       | 1.9697(15) | C(18)-C(19)         | 1.389(2)    |
| Ge(2)-Ge(3)       | 2.4715(3)  | C(19)-C(20)         | 1.385(3)    |
| Ge(3)-C(22)       | 1.9666(15) | C(20)-C(21)         | 1.387(2)    |
| Ge(3)-C(28)       | 1.9682(15) | C(22)-C(27)         | 1.397(2)    |
| Ge(3)-Ge(3)#1     | 2.4745(3)  | C(22)-C(23)         | 1.398(2)    |
| C(1)-C(3)         | 1.532(2)   | C(23)-C(24)         | 1.394(2)    |
| C(1)-C(2)         | 1.534(2)   | C(24)-C(25)         | 1.381(3)    |
| C(4)-C(6)         | 1.528(3)   | C(25)-C(26)         | 1.386(2)    |
| C(4)-C(5)         | 1.536(2)   | C(26)-C(27)         | 1.393(2)    |
| C(7)-C(9)         | 1.531(2)   | C(28)-C(33)         | 1.400(2)    |
| C(7)-C(8)         | 1.534(2)   | C(28)-C(29)         | 1.401(2)    |
| C(10)-C(15)       | 1.396(2)   | C(29)-C(30)         | 1.394(2)    |
| C(10)-C(11)       | 1.402(2)   | C(30)-C(31)         | 1.385(3)    |
| C(11)-C(12)       | 1.394(2)   | C(31)-C(32)         | 1.375(3)    |
| C(12)-C(13)       | 1.383(3)   | C(32)-C(33)         | 1.397(2)    |
|                   |            |                     |             |
| C(4)-Ge(1)-C(7)   | 108.99(7)  | C(22)-Ge(3)-Ge(2)   | 115.68(4)   |
| C(4)-Ge(1)-C(1)   | 108.74(7)  | C(28)-Ge(3)-Ge(2)   | 99.69(4)    |
| C(7)-Ge(1)-C(1)   | 108.48(7)  | C(22)-Ge(3)-Ge(3)#1 | 108.47(4)   |
| C(4)-Ge(1)-Ge(2)  | 109.19(5)  | C(28)-Ge(3)-Ge(3)#1 | 112.43(4)   |
| C(7)-Ge(1)-Ge(2)  | 109.49(5)  | Ge(2)-Ge(3)-Ge(3)#1 | 114.153(10) |
| C(1)-Ge(1)-Ge(2)  | 111.91(4)  | C(3)-C(1)-C(2)      | 109.86(14)  |
| C(16)-Ge(2)-C(10) | 107.95(6)  | C(3)-C(1)-Ge(1)     | 112.47(11)  |
| C(16)-Ge(2)-Ge(1) | 107.71(4)  | C(2)-C(1)-Ge(1)     | 114.69(11)  |
| C(10)-Ge(2)-Ge(1) | 110.80(4)  | C(6)-C(4)-C(5)      | 110.79(15)  |
| C(16)-Ge(2)-Ge(3) | 111.71(4)  | C(6)-C(4)-Ge(1)     | 113.61(12)  |
| C(10)-Ge(2)-Ge(3) | 100.93(4)  | C(5)-C(4)-Ge(1)     | 111.31(11)  |
| Ge(1)-Ge(2)-Ge(3) | 117.330(8) | C(9)-C(7)-C(8)      | 110.75(13)  |
| C(22)-Ge(3)-C(28) | 105.92(6)  | C(9)-C(7)-Ge(1)     | 112.73(12)  |

|                   |            |                   |            |
|-------------------|------------|-------------------|------------|
| C(8)-C(7)-Ge(1)   | 111.64(11) | C(27)-C(22)-C(23) | 118.27(14) |
| C(15)-C(10)-C(11) | 117.93(14) | C(27)-C(22)-Ge(3) | 120.13(11) |
| C(15)-C(10)-Ge(2) | 121.04(11) | C(23)-C(22)-Ge(3) | 121.60(12) |
| C(11)-C(10)-Ge(2) | 120.73(12) | C(24)-C(23)-C(22) | 120.80(15) |
| C(12)-C(11)-C(10) | 120.70(16) | C(25)-C(24)-C(23) | 120.09(16) |
| C(13)-C(12)-C(11) | 120.38(16) | C(24)-C(25)-C(26) | 119.99(15) |
| C(12)-C(13)-C(14) | 119.71(15) | C(25)-C(26)-C(27) | 120.02(15) |
| C(13)-C(14)-C(15) | 120.01(16) | C(26)-C(27)-C(22) | 120.80(15) |
| C(14)-C(15)-C(10) | 121.26(15) | C(33)-C(28)-C(29) | 117.99(14) |
| C(21)-C(16)-C(17) | 117.99(14) | C(33)-C(28)-Ge(3) | 120.09(12) |
| C(21)-C(16)-Ge(2) | 121.11(12) | C(29)-C(28)-Ge(3) | 121.47(11) |
| C(17)-C(16)-Ge(2) | 120.69(11) | C(30)-C(29)-C(28) | 120.68(16) |
| C(18)-C(17)-C(16) | 121.26(15) | C(31)-C(30)-C(29) | 120.17(17) |
| C(19)-C(18)-C(17) | 119.49(16) | C(32)-C(31)-C(30) | 120.16(16) |
| C(20)-C(19)-C(18) | 120.08(15) | C(31)-C(32)-C(33) | 120.05(17) |
| C(19)-C(20)-C(21) | 120.04(16) | C(32)-C(33)-C(28) | 120.93(17) |
| C(20)-C(21)-C(16) | 121.12(15) |                   |            |

---

Symmetry transformations used to generate equivalent atoms:

#1 -x+1,-y+1,-z+1



Table 4. Anisotropic displacement parameters ( $\text{\AA}^2 \times 10^3$ ) for wein145. The anisotropic displacement factor exponent takes the form:  $-2\pi^2[h^2 a^{*2}U^{11} + \dots + 2 h k a^* b^* U^{12}]$

|       | $U^{11}$ | $U^{22}$ | $U^{33}$ | $U^{23}$ | $U^{13}$ | $U^{12}$ |
|-------|----------|----------|----------|----------|----------|----------|
| Ge(1) | 10(1)    | 11(1)    | 14(1)    | -1(1)    | 2(1)     | 3(1)     |
| Ge(2) | 10(1)    | 10(1)    | 9(1)     | 1(1)     | 1(1)     | 3(1)     |
| Ge(3) | 9(1)     | 10(1)    | 9(1)     | 1(1)     | 1(1)     | 4(1)     |
| C(1)  | 11(1)    | 16(1)    | 20(1)    | 0(1)     | 0(1)     | 2(1)     |
| C(2)  | 16(1)    | 30(1)    | 23(1)    | 5(1)     | -3(1)    | 4(1)     |
| C(3)  | 15(1)    | 17(1)    | 25(1)    | 3(1)     | 3(1)     | 7(1)     |
| C(4)  | 14(1)    | 23(1)    | 19(1)    | -7(1)    | 1(1)     | 3(1)     |
| C(5)  | 25(1)    | 27(1)    | 29(1)    | -13(1)   | 3(1)     | 4(1)     |
| C(6)  | 20(1)    | 35(1)    | 15(1)    | -3(1)    | 4(1)     | 1(1)     |
| C(7)  | 23(1)    | 14(1)    | 24(1)    | 4(1)     | 6(1)     | 8(1)     |
| C(8)  | 22(1)    | 20(1)    | 33(1)    | 7(1)     | 1(1)     | 10(1)    |
| C(9)  | 24(1)    | 18(1)    | 52(1)    | 13(1)    | 14(1)    | 9(1)     |
| C(10) | 12(1)    | 16(1)    | 8(1)     | 0(1)     | 0(1)     | 3(1)     |
| C(11) | 19(1)    | 15(1)    | 17(1)    | 0(1)     | 4(1)     | 3(1)     |
| C(12) | 18(1)    | 22(1)    | 24(1)    | 1(1)     | 5(1)     | -4(1)    |
| C(13) | 11(1)    | 36(1)    | 19(1)    | 0(1)     | 3(1)     | 3(1)     |
| C(14) | 15(1)    | 29(1)    | 14(1)    | -1(1)    | -1(1)    | 12(1)    |
| C(15) | 14(1)    | 17(1)    | 11(1)    | 0(1)     | -1(1)    | 5(1)     |
| C(16) | 11(1)    | 9(1)     | 13(1)    | 0(1)     | -2(1)    | 1(1)     |
| C(17) | 14(1)    | 14(1)    | 14(1)    | 0(1)     | -1(1)    | 3(1)     |
| C(18) | 17(1)    | 16(1)    | 28(1)    | -1(1)    | 1(1)     | 7(1)     |
| C(19) | 20(1)    | 16(1)    | 32(1)    | 7(1)     | -5(1)    | 7(1)     |
| C(20) | 21(1)    | 20(1)    | 20(1)    | 10(1)    | -2(1)    | 2(1)     |
| C(21) | 16(1)    | 18(1)    | 15(1)    | 4(1)     | 1(1)     | 5(1)     |
| C(22) | 15(1)    | 9(1)     | 12(1)    | 0(1)     | 3(1)     | 4(1)     |
| C(23) | 15(1)    | 18(1)    | 19(1)    | 4(1)     | 2(1)     | 5(1)     |
| C(24) | 14(1)    | 24(1)    | 31(1)    | 8(1)     | 4(1)     | 2(1)     |
| C(25) | 22(1)    | 19(1)    | 29(1)    | 11(1)    | 12(1)    | 5(1)     |
| C(26) | 27(1)    | 17(1)    | 15(1)    | 5(1)     | 4(1)     | 9(1)     |
| C(27) | 17(1)    | 14(1)    | 13(1)    | 0(1)     | 1(1)     | 7(1)     |
| C(28) | 14(1)    | 19(1)    | 8(1)     | -2(1)    | -1(1)    | 9(1)     |

|       |       |       |       |       |       |       |
|-------|-------|-------|-------|-------|-------|-------|
| C(29) | 14(1) | 26(1) | 12(1) | -3(1) | -1(1) | 7(1)  |
| C(30) | 14(1) | 49(1) | 14(1) | -5(1) | -1(1) | 11(1) |
| C(31) | 27(1) | 60(1) | 19(1) | -1(1) | 0(1)  | 32(1) |
| C(32) | 40(1) | 37(1) | 21(1) | 3(1)  | 3(1)  | 30(1) |
| C(33) | 23(1) | 23(1) | 16(1) | 1(1)  | 1(1)  | 14(1) |

---

Table 5. Hydrogen coordinates ( $\times 10^4$ ) and isotropic displacement parameters ( $\text{\AA}^2 \times 10^{-3}$ ) for wein145.

|        | x     | y     | z     | U(eq) |
|--------|-------|-------|-------|-------|
| H(1A)  | 9329  | 9497  | 8780  | 19    |
| H(2A)  | 9891  | 7959  | 9562  | 36    |
| H(2B)  | 8489  | 6993  | 9246  | 36    |
| H(2C)  | 8685  | 8224  | 10081 | 36    |
| H(3A)  | 10351 | 8237  | 7783  | 28    |
| H(3B)  | 9499  | 8741  | 7038  | 28    |
| H(3C)  | 8993  | 7326  | 7268  | 28    |
| H(4A)  | 5509  | 9195  | 9275  | 24    |
| H(5A)  | 6808  | 10461 | 10765 | 45    |
| H(5B)  | 7348  | 10916 | 9687  | 45    |
| H(5C)  | 8014  | 10128 | 10313 | 45    |
| H(6A)  | 5554  | 8297  | 10829 | 38    |
| H(6B)  | 6662  | 7773  | 10405 | 38    |
| H(6C)  | 5270  | 7256  | 9804  | 38    |
| H(7A)  | 6981  | 9284  | 6449  | 24    |
| H(8A)  | 6018  | 10868 | 6808  | 36    |
| H(8B)  | 6017  | 10701 | 8030  | 36    |
| H(8C)  | 5163  | 9586  | 7164  | 36    |
| H(9A)  | 8328  | 11385 | 6771  | 45    |
| H(9B)  | 9050  | 10464 | 7119  | 45    |
| H(9C)  | 8514  | 11271 | 7995  | 45    |
| H(11A) | 3693  | 4126  | 7854  | 21    |
| H(12A) | 1572  | 3594  | 8292  | 29    |
| H(13A) | 582   | 5128  | 8591  | 28    |
| H(14A) | 1723  | 7210  | 8460  | 23    |
| H(15A) | 3836  | 7747  | 8011  | 17    |
| H(17A) | 7517  | 5134  | 6470  | 17    |
| H(18A) | 8616  | 3850  | 7029  | 24    |
| H(19A) | 8303  | 3201  | 8694  | 26    |
| H(20A) | 6835  | 3766  | 9757  | 25    |
| H(21A) | 5713  | 5013  | 9184  | 20    |
| H(23A) | 8049  | 7312  | 5466  | 21    |

|        |      |      |      |    |
|--------|------|------|------|----|
| H(24A) | 9478 | 8644 | 4485 | 28 |
| H(25A) | 8721 | 9379 | 3070 | 28 |
| H(26A) | 6533 | 8758 | 2612 | 23 |
| H(27A) | 5101 | 7378 | 3555 | 17 |
| H(29A) | 2377 | 4933 | 5664 | 22 |
| H(30A) | 600  | 5623 | 5801 | 31 |
| H(31A) | 788  | 7684 | 5615 | 38 |
| H(32A) | 2753 | 9075 | 5328 | 34 |
| H(33A) | 4547 | 8408 | 5208 | 23 |

---

**Packing of 1 along the crystallographic *a*-axis**

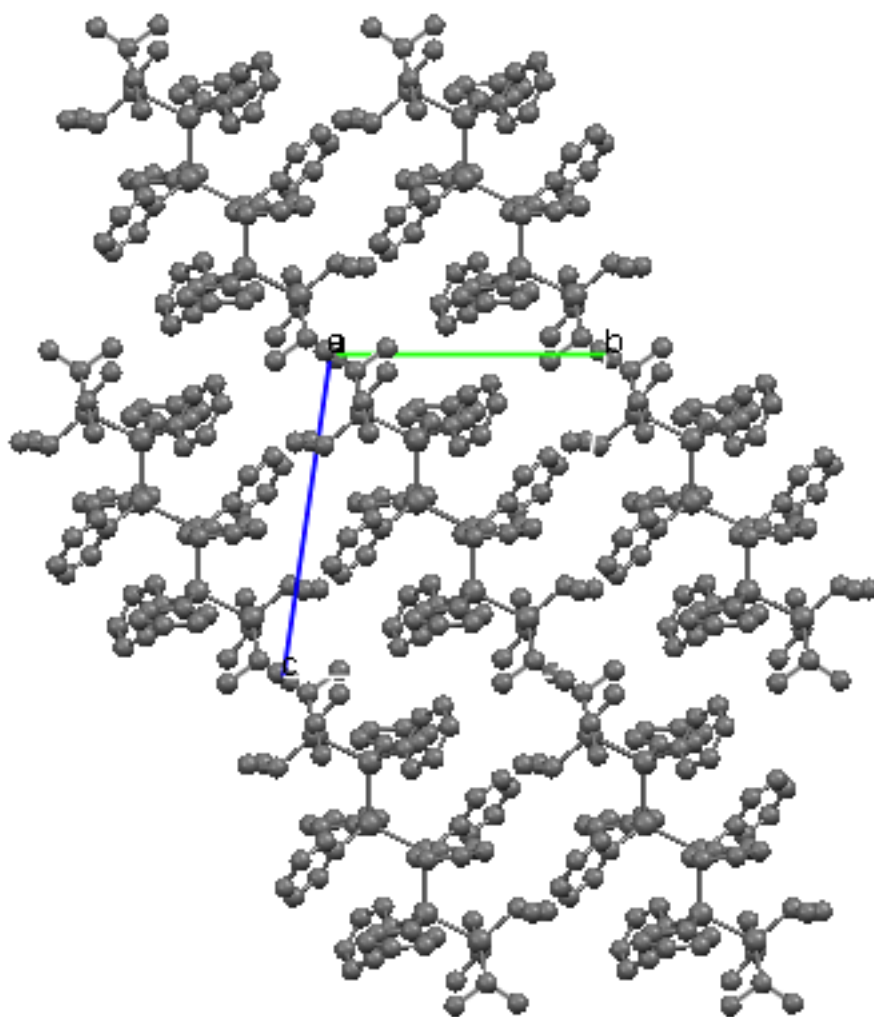

**Packing of 1 along the crystallographic *b*-axis**

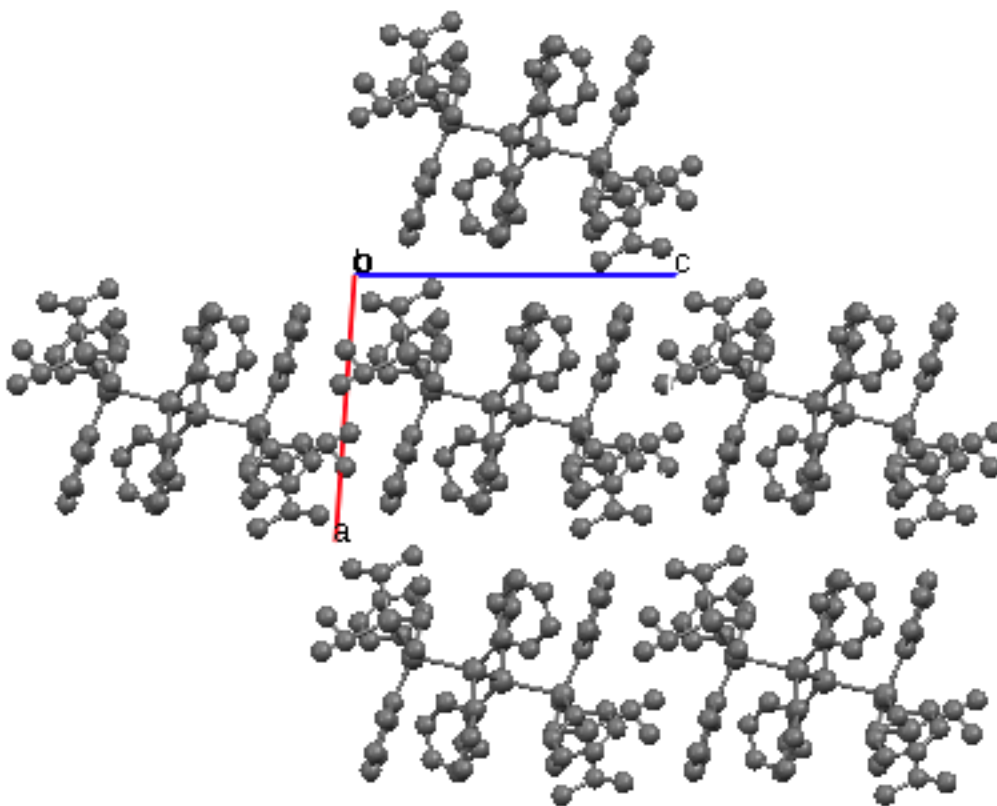

**Packing of 1 along the crystallographic *c*-axis**

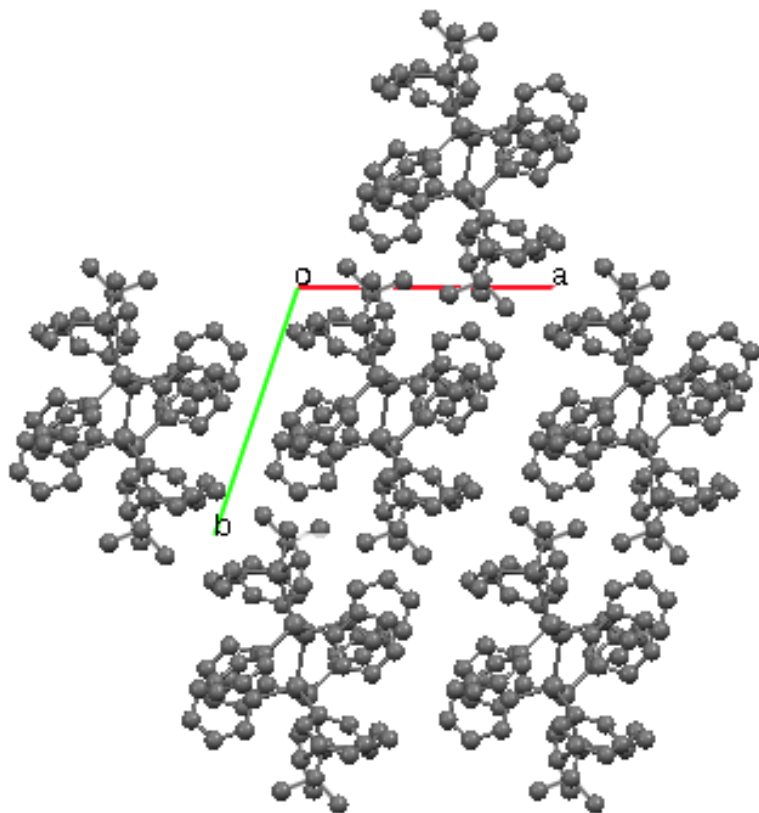

Supplement: c3cc45450a.pdf [file c3cc45450a.pdf]
